# Supplementary material
Source: PubMed Central journal article supplement (PMC4397500)

Supporting Information for

Mechanism and Inhibition of saFabI, the Enoyl  
Reductase from *Staphylococcus aureus*<sup>†</sup>

*Hua Xu,<sup>‡</sup> Todd Sullivan,<sup>‡</sup> Jun-ichiro Sekiguchi,<sup>§</sup> Teruo Kirikae,<sup>§</sup> Iwao Ojima,<sup>‡</sup> Weiming Mao,<sup>⊥</sup>  
Fernando L Rock,<sup>⊥</sup> M. R. K. Alley,<sup>⊥</sup> Francis Johnson,<sup>‡</sup> Stephen G. Walker,<sup>||</sup> and Peter J. Tonge<sup>‡,\*</sup>*

*Institute for Chemical Biology & Drug Discovery, Department of Chemistry, Stony Brook University,  
Stony Brook, NY 11794-3400, School of Dental Medicine, Stony Brook University, Stony Brook, NY  
11794, Department of Infectious Diseases, International Medical Center of Japan, Tokyo 162-8655,  
Japan, and Discovery Biology, Anacor Pharmaceuticals Incorporation, Palo Alto, CA 94303*

**Table S1 Nucleotide Primers**

| Name              | Sequence <sup>a</sup>                               |
|-------------------|-----------------------------------------------------|
| saFabI forward    | 5'GAGACATATGTTAAATCTTGAAAACAAAACCTTATGTCATCATGGG 3' |
| saFabI reverse    | 5' CTCGGATCCAATAACGTGAACAAAGCTGTTGAATG 3'           |
| saACP forward     | 5' GGAATTCCATATGGTGGAATAATTCGATAAAG 3'              |
| saACP reverse     | 5' CCGCTCGAGTTTTTCAAGACTGTTAATAAA 3'                |
| A95V forward      | 5' GTGTATATCATTCAATCGTATTTGCTAATATGGAAG 3'          |
| A95V reverse      | 5' CTTCCATATTAGCAAATACGATTGAATGATATACAC 3'          |
| I193S forward     | 5' CAGCTAGTCCAAGCCGTACATTAAG 3'                     |
| I193S reverse     | 5' CTTAATGTACGGCTTGGACTAGCTG 3'                     |
| F204S forward     | 5' CAAAAGGTGTGGGTGGTTCCAATACAATTCTTAAAG 3'          |
| F204S reverse     | 5' CTTTAAGAATTGTATTGGAACCACCCACACCTTTTG 3'          |
| R40Q forward      | 5' GTATTTACTTACCAGAAAGAACGTAGCCG 3'                 |
| R40Q reverse      | 5' CGGCTACGTTCTTTCTGGTAAGTAAATAC 3'                 |
| K41N forward      | 5' GTATTTACTTACCGTAACGAACGTAGCCGTAAAG 3'            |
| K41N reverse      | 5' CTTTACGGCTACGTTCTTACGGTAAGTAAATAC 3'             |
| R40Q/K41N forward | 5' GTATTTACTTACCAGAACGAACGTAGCCGTAAAG 3'            |
| R40Q/K41N reverse | 5' CTTTACGGCTACGTTCTTCTGGTAAGTAAATAC 3'             |

<sup>a</sup> Restriction sites are italicized, and mutated sites are shown in underline.

**Table S2: MICs of diphenyl ethers against different strains of *S. aureus***

| Strains    | MIC $\mu\text{g/mL}$ ( $\mu\text{M}$ ) |             |             |
|------------|----------------------------------------|-------------|-------------|
|            | Triclosan                              | EPP         | CPP         |
| ATCC 29213 | 0.03 (0.10)                            | 0.03 (0.14) | 0.03 (0.14) |
| N315       | 0.03 (0.10)                            | 0.03 (0.14) | 0.06 (0.27) |
| Mu50       | 0.06 (0.20)                            | 0.06 (0.27) | 0.12 (0.54) |

**Table S3: MICs of diphenyl ethers against *S. aureus* and *E. faecalis***

| Compound  | MIC ( $\mu\text{g/mL}$ )       |                                  |
|-----------|--------------------------------|----------------------------------|
|           | <i>S. aureus</i><br>ATCC 25923 | <i>E. faecalis</i><br>ATCC 19433 |
| Triclosan | 0.03                           | >32                              |
| EPP       | 0.03                           | >32                              |
| CPP       | 0.06                           | >32                              |

## Figure Legends for Supplemental Information

**Figure S1: Fluorescence titration of saFabI with apo-saACP.** The excitation wavelength was 290 nm, and the emission wavelength was 336 nm.

**Figure S2: Double Reciprocal Plots for the Reaction of DDsaACP and NADPH with Wild Type saFabI** (A) Double reciprocal plot obtained by varying DDsaACP in the presence of 250  $\mu$ M NADPH ( $\circ$ ), 100  $\mu$ M NADPH ( $\bullet$ ) and 50  $\mu$ M NADPH ( $\square$ ). (B) Double reciprocal plot obtained by varying NADPH in the presence of 15  $\mu$ M DDsaACP ( $\circ$ ), 8.2  $\mu$ M DDsaACP ( $\bullet$ ), and 4.4  $\mu$ M DDsaACP ( $\square$ ).

**Figure S3: Double Reciprocal Plots Showing the Effect of NADP<sup>+</sup> on the Reaction of DDsaACP and NADPH with Wild Type saFabI** (A) Reactions were carried out in the absence of NADP<sup>+</sup> ( $\circ$ ), or in the presence of 1.4 mM NADP<sup>+</sup> ( $\bullet$ ) and 2.7 mM NADP<sup>+</sup> ( $\square$ ). (B) Reactions were carried out in the absence of NADP<sup>+</sup> ( $\circ$ ), or in the presence of 0.7 mM NADP<sup>+</sup> ( $\bullet$ ) and 1.4 mM NADP<sup>+</sup> ( $\square$ ).

**Figure S4: Fluorescence Titration of saFabI with DDsaACP** Excitation wavelength is 290 nm, and emission wavelength is 336 nm.

**Figure S5. Fluorescence Titration of saFabI with the Diphenyl Ether Inhibitors** Fluorescence titration of saFabI with triclosan (A), EPP (B) and CPP (C), respectively. The excitation wavelength was 290 nm, and the emission wavelength was 336nm.

**Figure S6: Inhibition of A95V saFabI by the Diphenyl Ethers** (A) Triclosan: 0 (○), 11.0 (●), 38.6 (□) and 65.0 μM (■) triclosan. (B) EPP: 0 (○), 0.9 (●), 1.8 (□) and 5.0 μM (■) EPP. (C) CPP: 0 (○), 3.1 (●), 6.2 (□) and 12.4 μM (■) CPP.

**Figure S7: Inhibition of I193S saFabI by the Diphenyl Ethers** (A) Triclosan: 0 (○), 0.22 (●), 0.44 (□) and 0.88 μM (■) triclosan. (B) EPP: 0 (○), 0.21 (●) and 0.35 μM (□) EPP. (C) CPP: 0 (○), 0.31 (●) and 0.62 μM (□) CPP.

**Figure S8: Inhibition of F204S saFabI by the Diphenyl Ethers** (A) Triclosan: 0 (○), 0.28 (●), 0.55 (□) and 1.10 μM (■) triclosan. (B) EPP: 0 (○), 0.24 (●), 0.47 (□) and 1.10 μM (■) EPP. (C) CPP: 0 (○), 0.64 (●), 1.28 (□) and 2.48 μM (■) CPP.

**Figure S1: Fluorescence titration of saFabI with apo-ACP.**

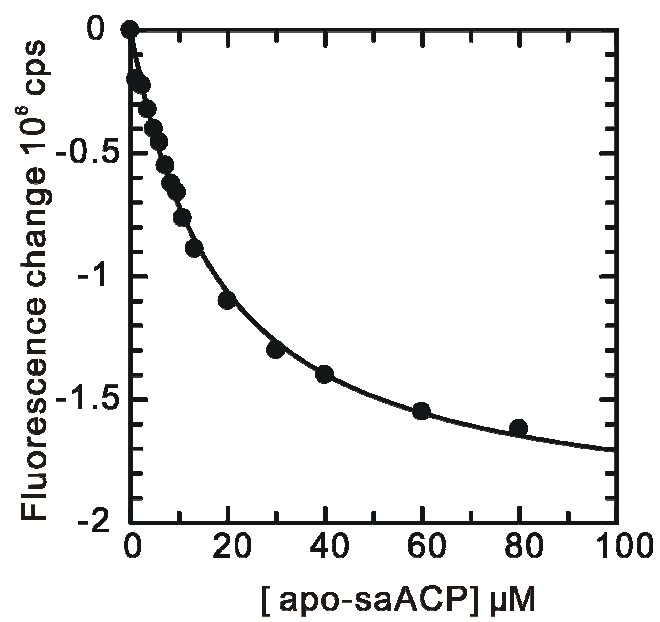

**Figure S2: Double Reciprocal Plots for the Reaction of DDsaACP and NADPH with Wild Type saFabI**

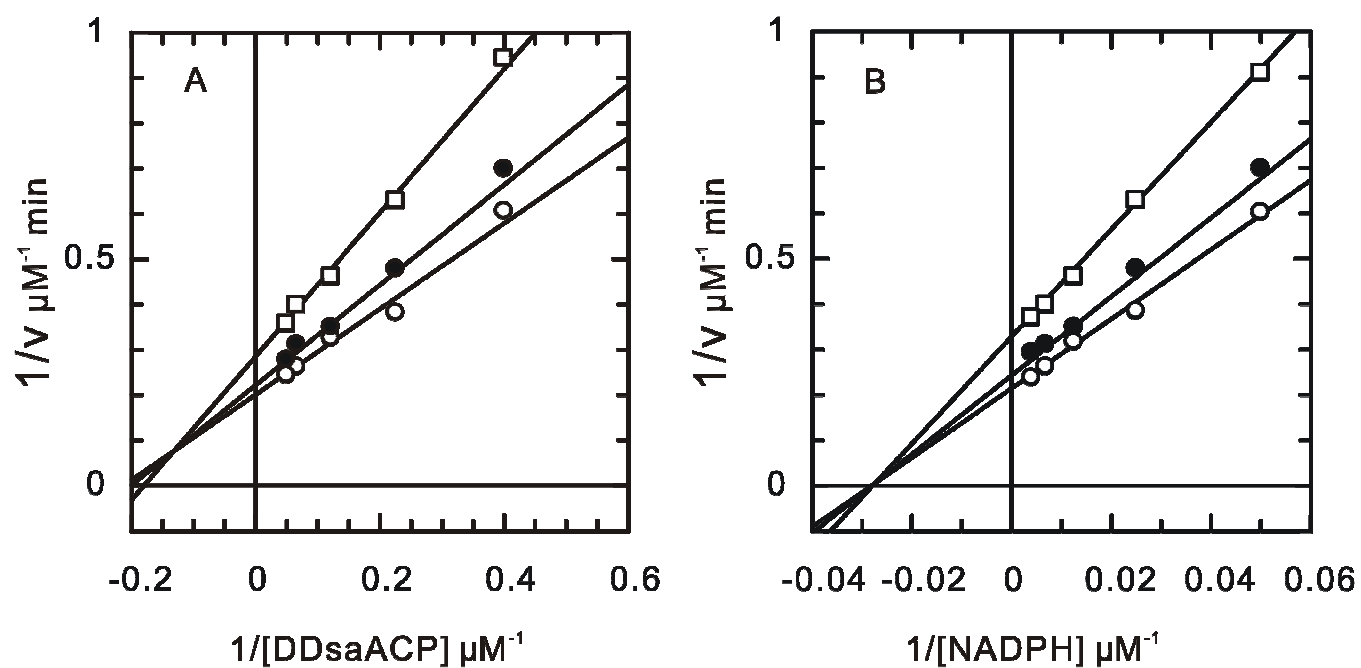

**Figure S3: Double Reciprocal Plots Showing the Effect of NADP<sup>+</sup> on the Reaction of DDsaACP and NADPH with Wild Type saFabI**

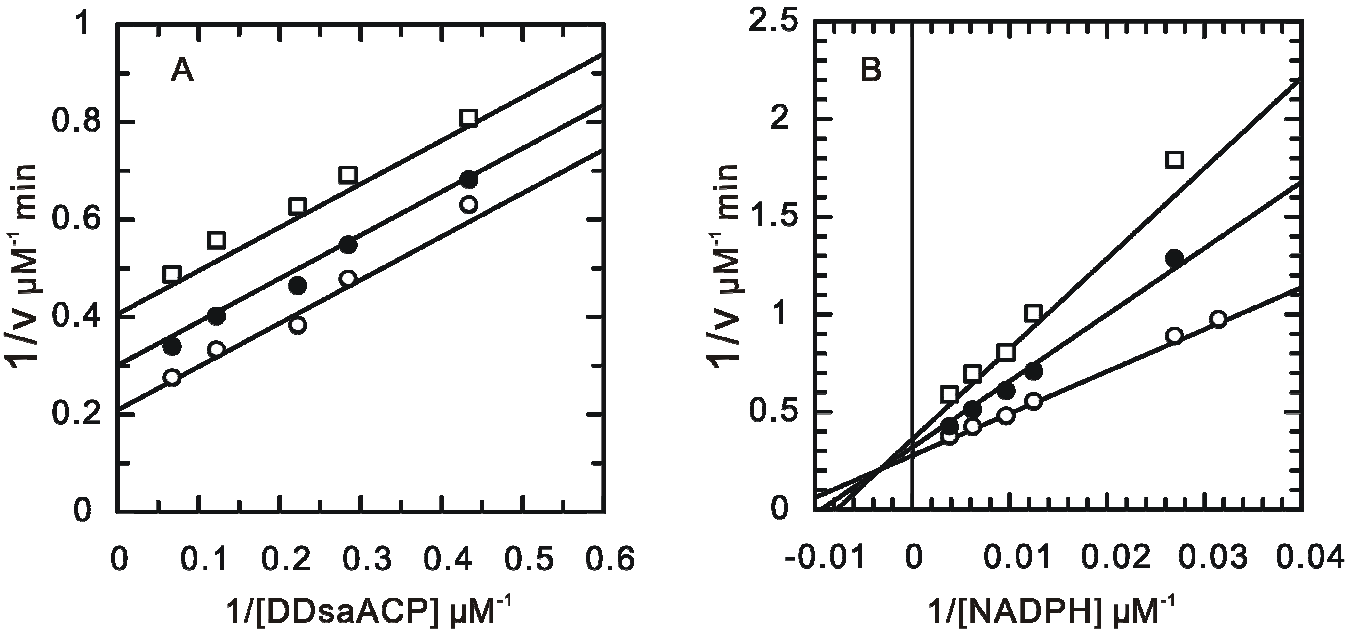

**Figure S4: Fluorescence Titration of saFabI with DDsaACP.**

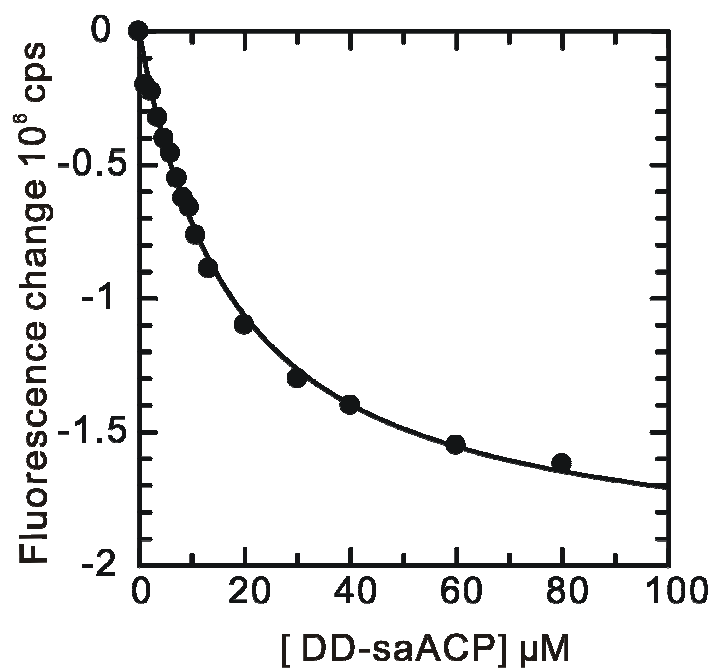

Figure S5. Fluorescence Titration of saFabI with the Diphenyl Ether Inhibitors.

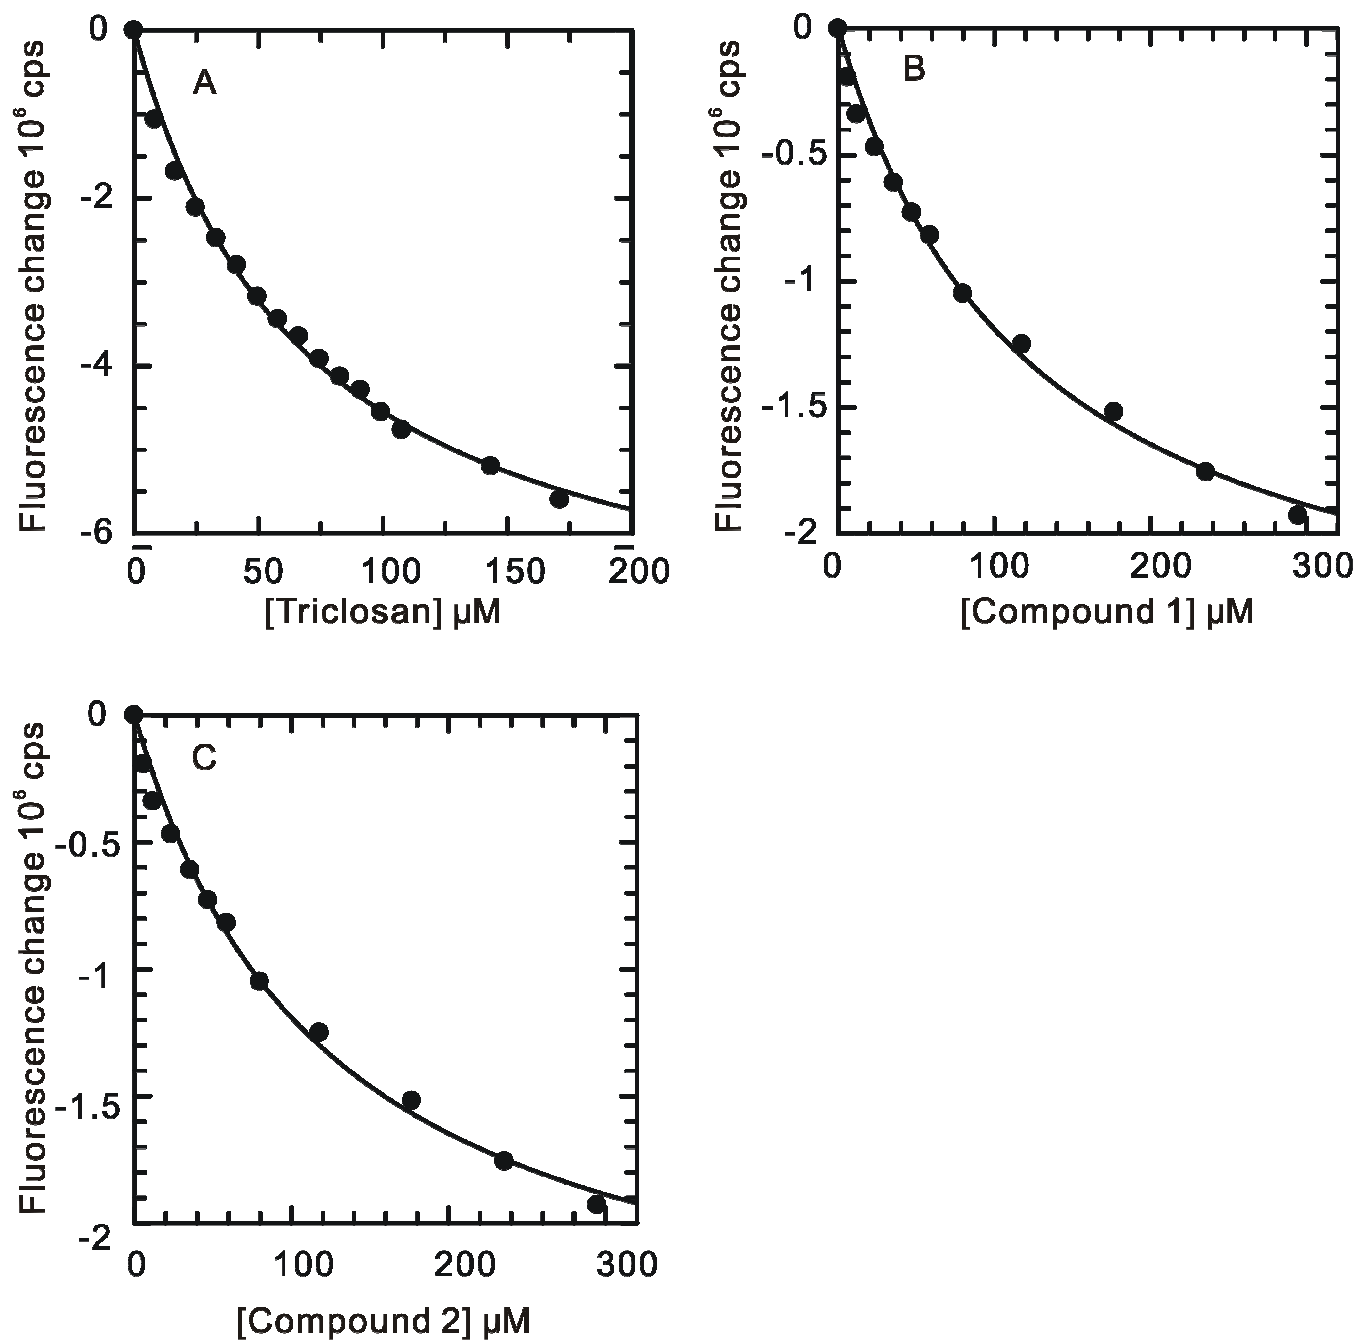

Figure S6: Inhibition of A95V saFabI by the Diphenyl Ethers.

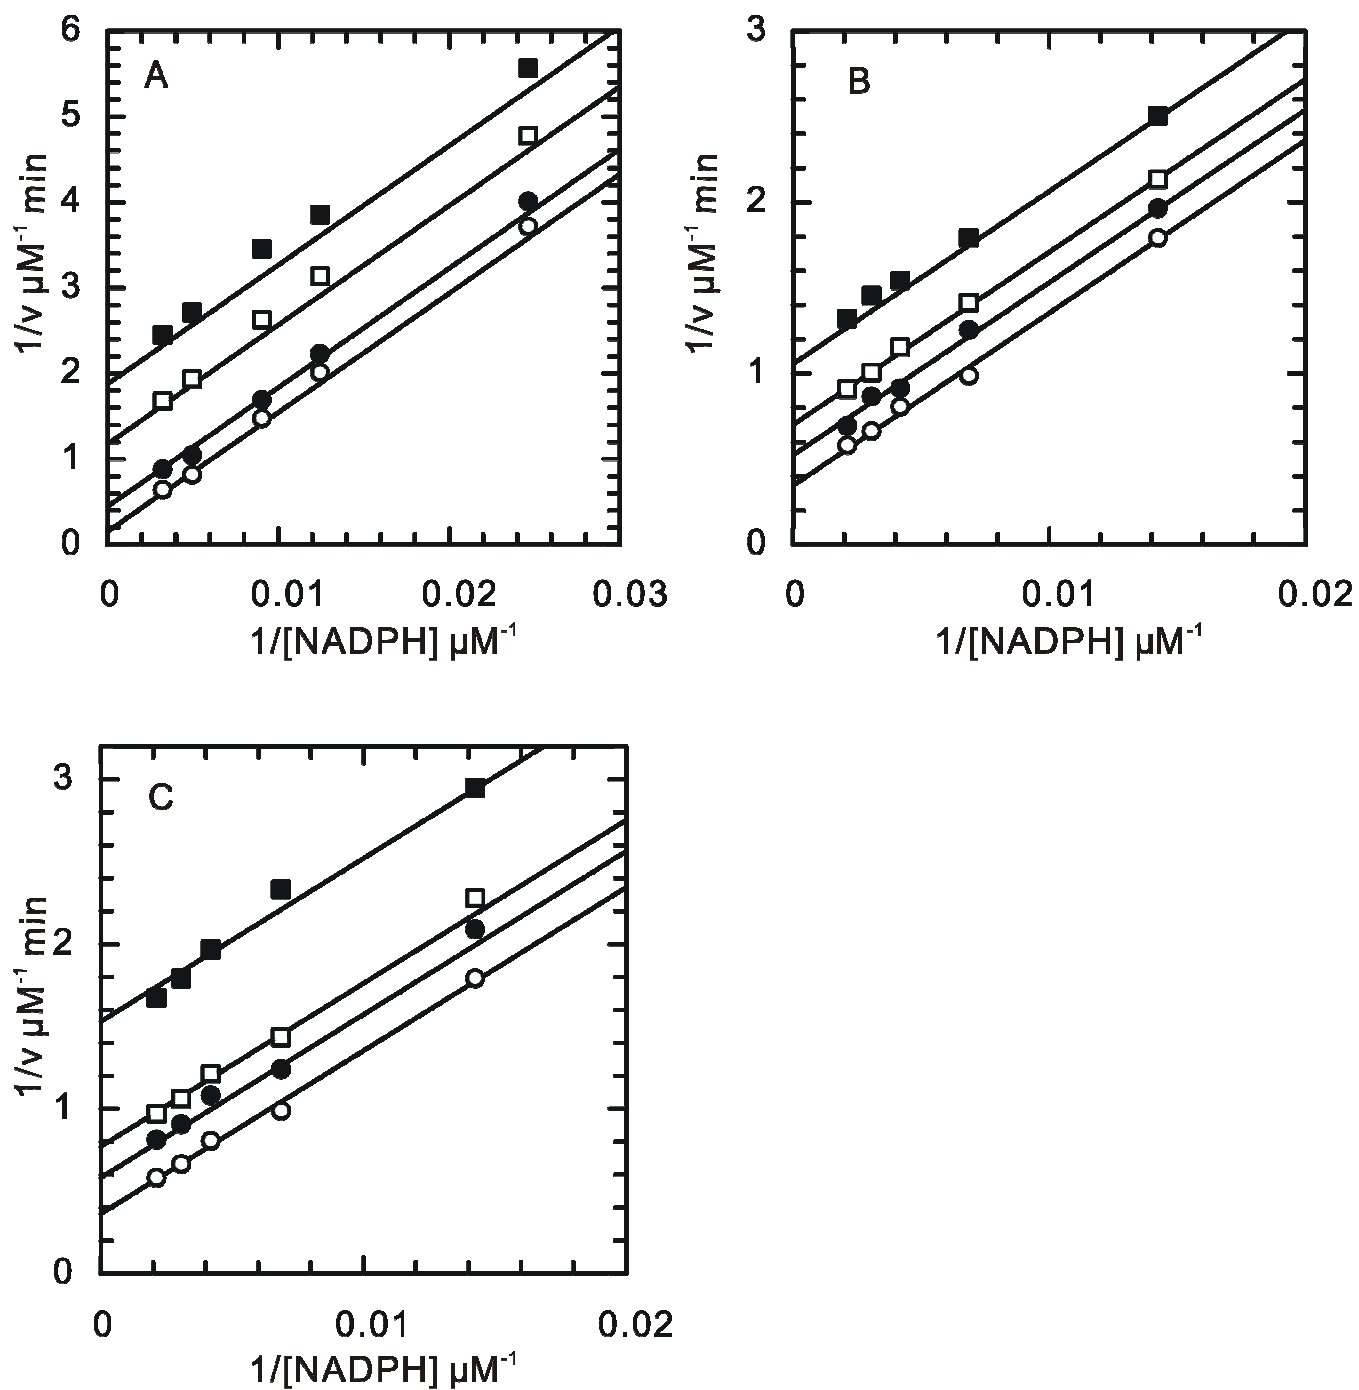

Figure S7: Inhibition of I193S saFabI by the Diphenyl Ethers.

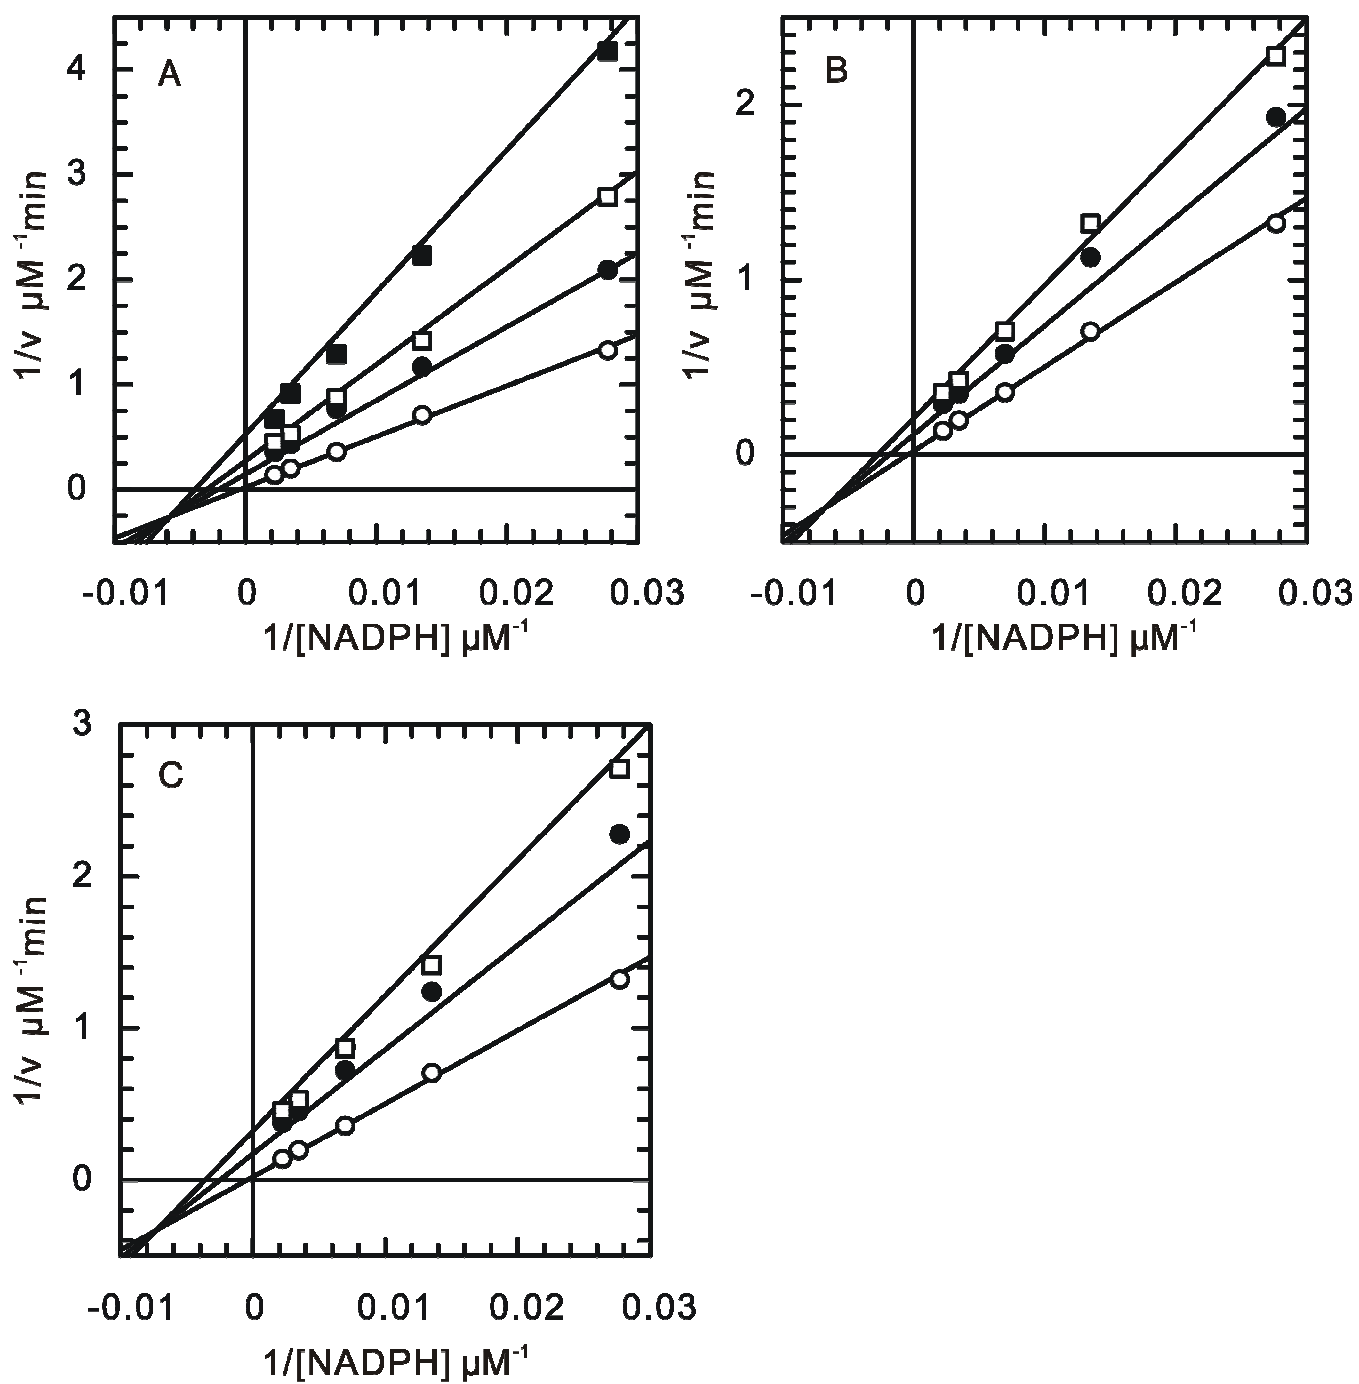

Figure S8: Inhibition of F204S saFabI by the Diphenyl Ethers.

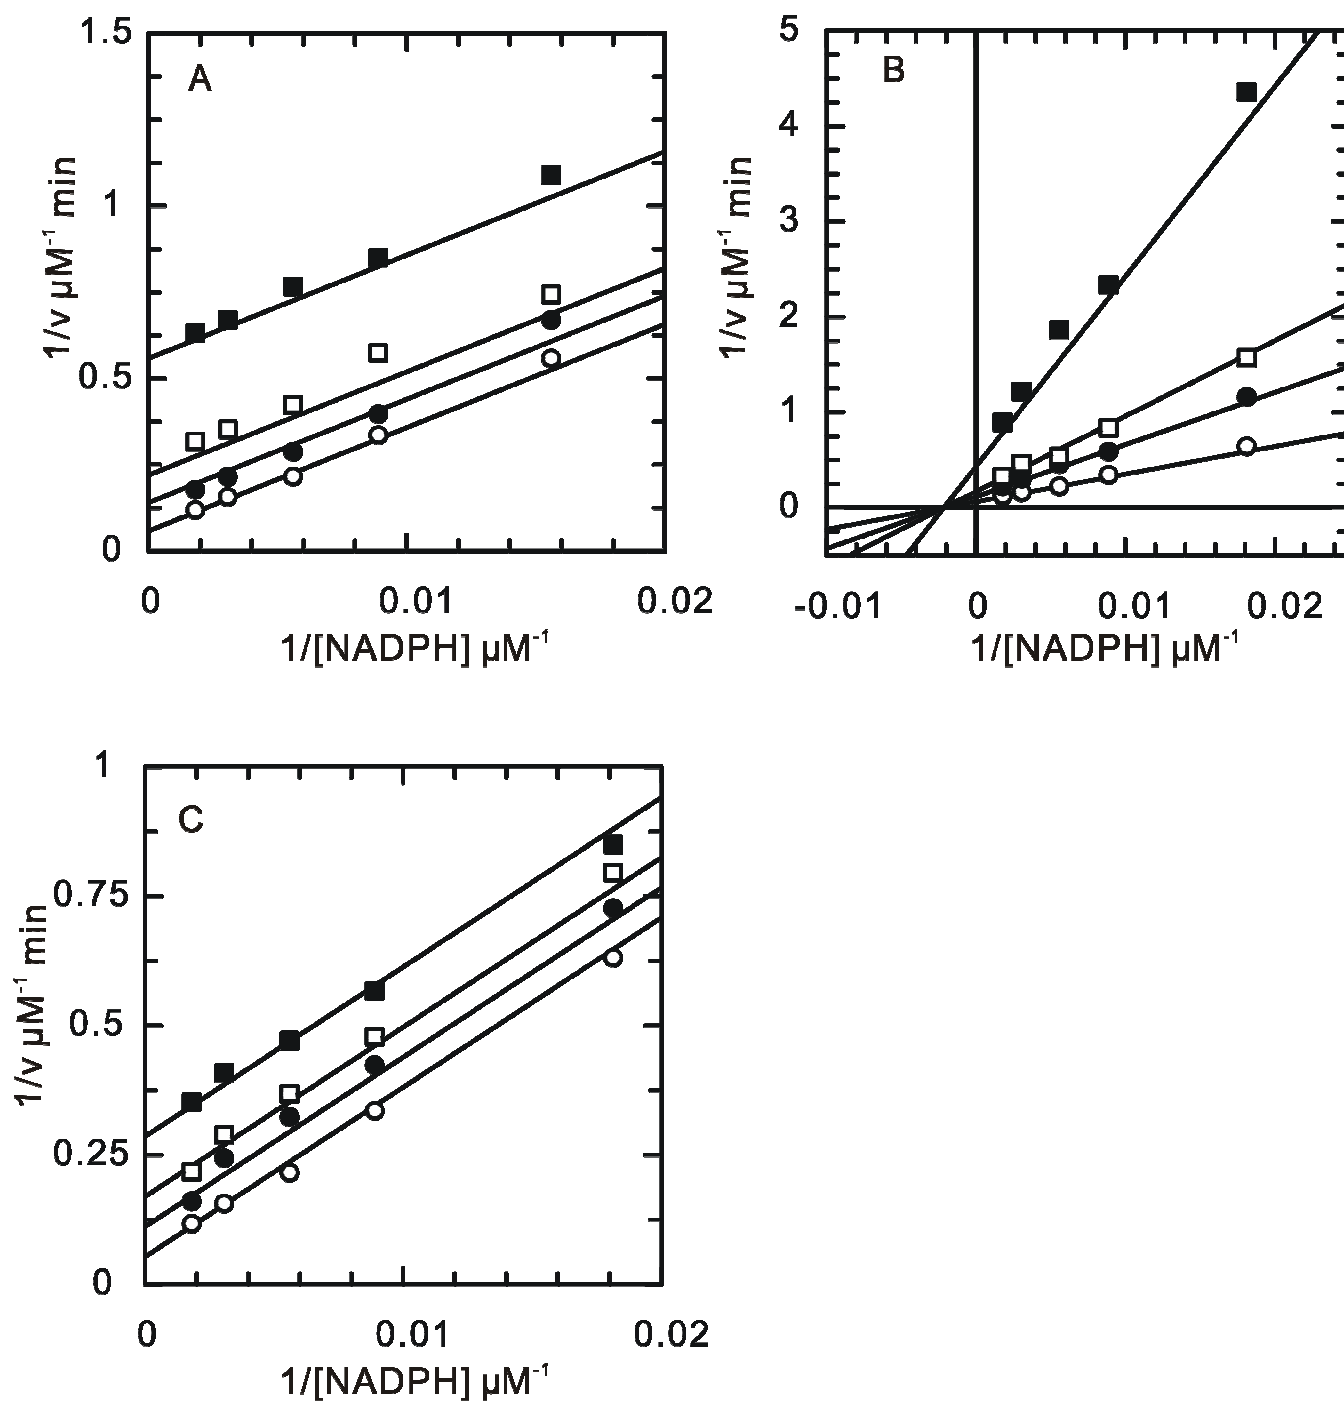

Supplement: NIHMS674486-supplement-Supplementary_Information.pdf [file NIHMS674486-supplement-Supplementary_Information.pdf]
